# Supplementary material for: Theoretical design of two-dimensional AMInP2X3Y3 (AM = Li, Na, K; X/Y = S, Se, Te) monolayers for highly efficient excitonic solar cells
Source: Royal Society of Chemistry journal article supplement (doi:10.1039/d2ma00937d), 2022-12-09
Supplement: d2ma00937d1.pdf [file d2ma00937d1.pdf]

# Support Information for Theoretical Design of Two-dimensional AMInP<sub>2</sub>X<sub>3</sub>Y<sub>3</sub> (AM = Li, Na, K; X/Y = S, Se, Te) monolayers for highly efficient excitonic solar cells

Linlin Liu,<sup>a</sup> Yu Xie,<sup>\*a,b</sup> John S.Tse,<sup>\*a,c</sup> and Yanming Ma,<sup>a,d</sup>

## 1 Computational method

The solar-to-hydrogen (STH) efficiency<sup>1,2</sup> is determined as

$$\eta_{STH} = \eta_{abs} \times \eta_{cu} \quad (1)$$

where  $\eta_{abs}$  is the light absorption efficiency,  $\eta_{cu}$  is the carrier utilization. And the efficiency of optical absorption is calculated by the following expression:

$$\eta_{abs} = \frac{\int_{E_g}^{\infty} P(h\omega)d(h\omega)}{\int_0^{\infty} P(h\omega)d(h\omega)} \quad (2)$$

where  $P(h\omega)$  is the AM1.5G solar energy flux<sup>3</sup> at the photon energy  $h\omega$  and  $E_g$  is the band gap of semiconductor materials. The efficiency of carrier utilization is defined as

$$\eta_{cu} = \frac{\Delta G \int_E^{\infty} \frac{P(h\omega)}{h\omega} d(h\omega)}{\int_{E_g}^{\infty} P(h\omega)d(h\omega)} \quad (3)$$

where  $\Delta G$  is the potential difference between the redox potentials of  $H_2O/O_2$  and  $H^+/H_2$  of 1.23 eV for water splitting.  $E$  is the minimum energy of photons that can be used for water splitting. Considering energy barriers of both HER and OER<sup>4,5</sup>,  $E$  can be defined as

$$E = \begin{cases} E_g, (\chi(H_2) \geq 0.2, \chi(O_2) \geq 0.6) \\ E_g + 0.2 - \chi(H_2), (\chi(H_2) < 0.2, \chi(O_2) \geq 0.6) \\ E_g + 0.6 - \chi(O_2), (\chi(H_2) \geq 0.2, \chi(O_2) < 0.6) \\ E_g + 0.8 - \chi(O_2) - \chi(H_2), (\chi(H_2) < 0.2, \chi(O_2) < 0.6) \end{cases} \quad (4)$$

$\chi(H_2)$  is the energy difference between redox potentials  $H^+/H_2$  and CBM.  $\chi(O_2)$  is the energy difference between redox potentials  $H_2O/O_2$  and VBM.

The thermodynamics of water splitting on 2D AMInP<sub>2</sub>X<sub>3</sub>Y<sub>3</sub> monolayers are estimated by examining the HER and OER processes. We marked \*, H\*, OH\*, O\*, OOH\* as the bare surface, and HER, OER intermediates adsorbed on the 2D AMInP<sub>2</sub>X<sub>3</sub>Y<sub>3</sub> monolayers. l and g refer to liquid and gas phases, respectively.

The overall hydrogen evolution reaction under standard conditions can be described as follows:

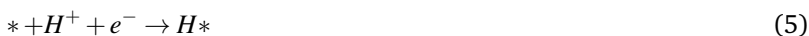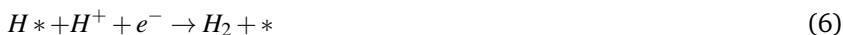

While for OER, the four-electron process is interpreted as following four elementary steps:

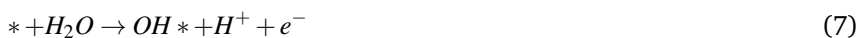

<sup>a</sup>International Center for Computational Method & Software and State Key Laboratory of Superhard Materials, College of Physics, Jilin University, Changchun, 130012, China

<sup>b</sup>Key Laboratory of Physics and Technology for Advanced Batteries (Ministry of Education), Jilin University, Changchun, 130012, China. E-mail: xieyu@jlu.edu.cn

<sup>c</sup>Department of Physics and Engineering Physics, University of Saskatchewan, Saskatoon, SK S7N 5E2, Canada. E-mail: john.tse@usask.ca

<sup>d</sup>International Center of Future Science, Jilin University, 130012 Changchun, China. E-mail: mym@jlu.edu.cn

**Table S1** Values used for the entropy and zero-point energy corrections in determining the free energy of reactants, products, and intermediate species adsorbed on catalysts<sup>7</sup>.

| Species             | T × S (eV) | ZPE (eV) |
|---------------------|------------|----------|
| H*                  | 0          | 0.17     |
| O*                  | 0.06       | 0.07     |
| OH*                 | 0.08       | 0.33     |
| OOH*                | 0.21       | 0.43     |
| H <sub>2</sub> (g)  | 0.41       | 0.27     |
| H <sub>2</sub> O(g) | 0.58       | 0.57     |

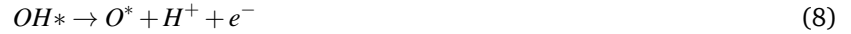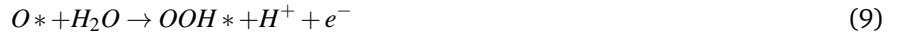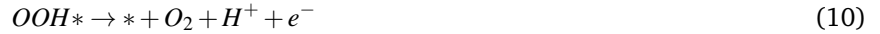

For each reaction of both oxidation and hydrogen production, the free energy is different under the effect of pH and an extra potential bias can be written as:

$$\Delta G = \Delta E + \Delta ZPE - T\Delta S + \Delta G_{pH} + \Delta G_U \quad (11)$$

The  $\Delta E$ ,  $\Delta ZPE$ , and  $\Delta S$  are different energy, zero-point energy, and entropy of the reaction, respectively. The  $\Delta E$  is obtained from DFT calculation, while the  $\Delta ZPE$ , and  $\Delta S$  are calculated from the values of Table S1. The entropies of free molecules can be found in the NIST database<sup>6</sup>. As the DFT method cannot accurately describe the high-spin ground state of the O<sub>2</sub> molecule, the Gibbs free energy of O<sub>2</sub> [ $G_{O_2}$ ] is obtained by  $G_{O_2} = 2G_{H_2O} - 2G_{H_2} + 4.92$ .  $T$  represents indoor temperature in this work.  $\Delta G_{pH}$  ( $\Delta G_{pH} = k_B T \times \ln 10 \times \text{pH}$ ) represents the free energy contributed in different pH concentrations.  $\Delta G_U$  ( $\Delta G_U = -eU$ ) denotes extra potential bias provided by an electron in the electrode, where  $U$  is the electrode potential relative to the standard hydrogen electrode (SHE).  $\Delta G_U$  refers to the Gibbs free energy change imposed by light-induced driven potential ( $U$ ) and equals  $-eU$ . The light-induced driven potential for HER can be obtained by  $U_e = [E_{CBM} - (-4.44 + 0.059 \times \text{pH})]/e$ , and the driven potential for OER is determined by  $U_h = [-E_{VBM} + (-4.44 + 0.059 \times \text{pH})]/e$ .  $E_{VBM}$  and  $E_{CBM}$  represent the energy level of the valance band maximum (VBM) and conduction band minimum (CBM) of the photocatalysts, respectively. Both the VBM and CBM were regulated by the vacuum level.

$$\Delta G_1 = G_{H^*} - \frac{1}{2}G_{H_2} - G^* + \Delta G_U + \Delta G_{pH} \quad (12)$$

$$\Delta G_2 = G^* + \frac{1}{2}G_{H_2} - G_{H^*} + \Delta G_U + \Delta G_{pH} \quad (13)$$

$$\Delta G_3 = G_{OH^*} + \frac{1}{2}G_{H_2} - G^* - G_{H_2O} + \Delta G_U - \Delta G_{pH} \quad (14)$$

$$\Delta G_4 = G_{O^*} + \frac{1}{2}G_{H_2} - G_{OH^*} + \Delta G_U - \Delta G_{pH} \quad (15)$$

$$\Delta G_5 = G_{OOH^*} + \frac{1}{2}G_{H_2} - G_{O^*} - G_{H_2O} + \Delta G_U - \Delta G_{pH} \quad (16)$$

$$\Delta G_6 = G^* + \frac{1}{2}G_{H_2} + G_{O_2} - G_{OOH^*} + \Delta G_U - \Delta G_{pH} \quad (17)$$

We calculated the orientation-dependent Poisson's ratio  $\nu(\theta)$  and Young's modulus  $Y(\theta)$  for the lowest energy phase in 2D AMInP<sub>2</sub>X<sub>3</sub>Y<sub>3</sub> monolayers by using the following equations

$$Y(\theta) = \frac{C_{11}C_{22} - C_{12}^2}{C_{11}\sin^4(\theta) + A\sin^2(\theta)\cos^2(\theta) + C_{22}\cos^4(\theta)} \quad (18)$$

$$\nu(\theta) = \frac{C_{12}\sin^4(\theta) - B\sin^2(\theta)\cos^2(\theta) + C_{12}\cos^4(\theta)}{C_{11}\sin^4(\theta) + A\sin^2(\theta)\cos^2(\theta) + C_{22}\cos^4(\theta)} \quad (19)$$

where  $A = (C_{11}C_{22} - C_{12}^2)/C_{66} - 2C_{12}$  and  $B = C_{11} + C_{22} - (C_{11}C_{22} - C_{12}^2)/C_{66}$ .

## 2 Structure and Stability

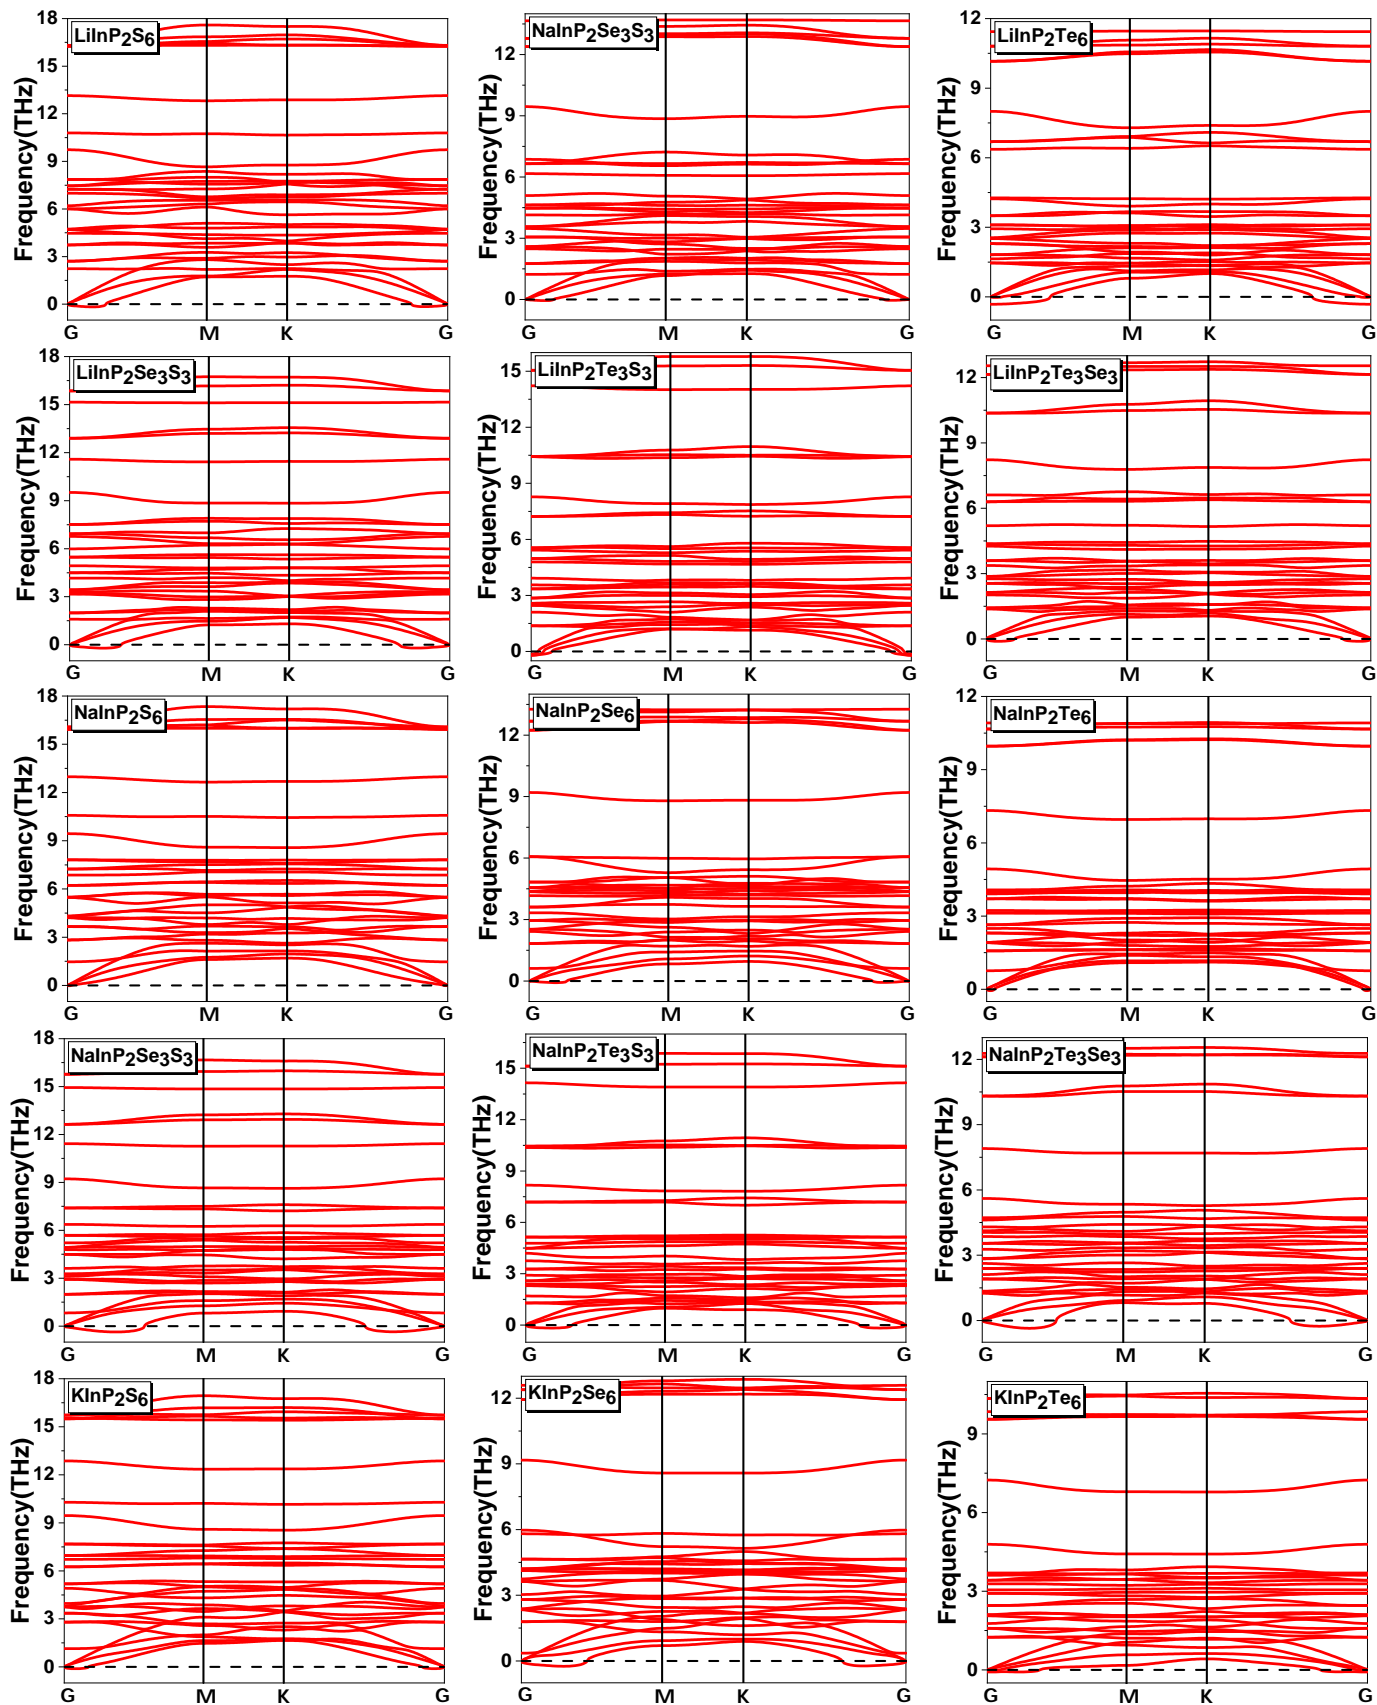

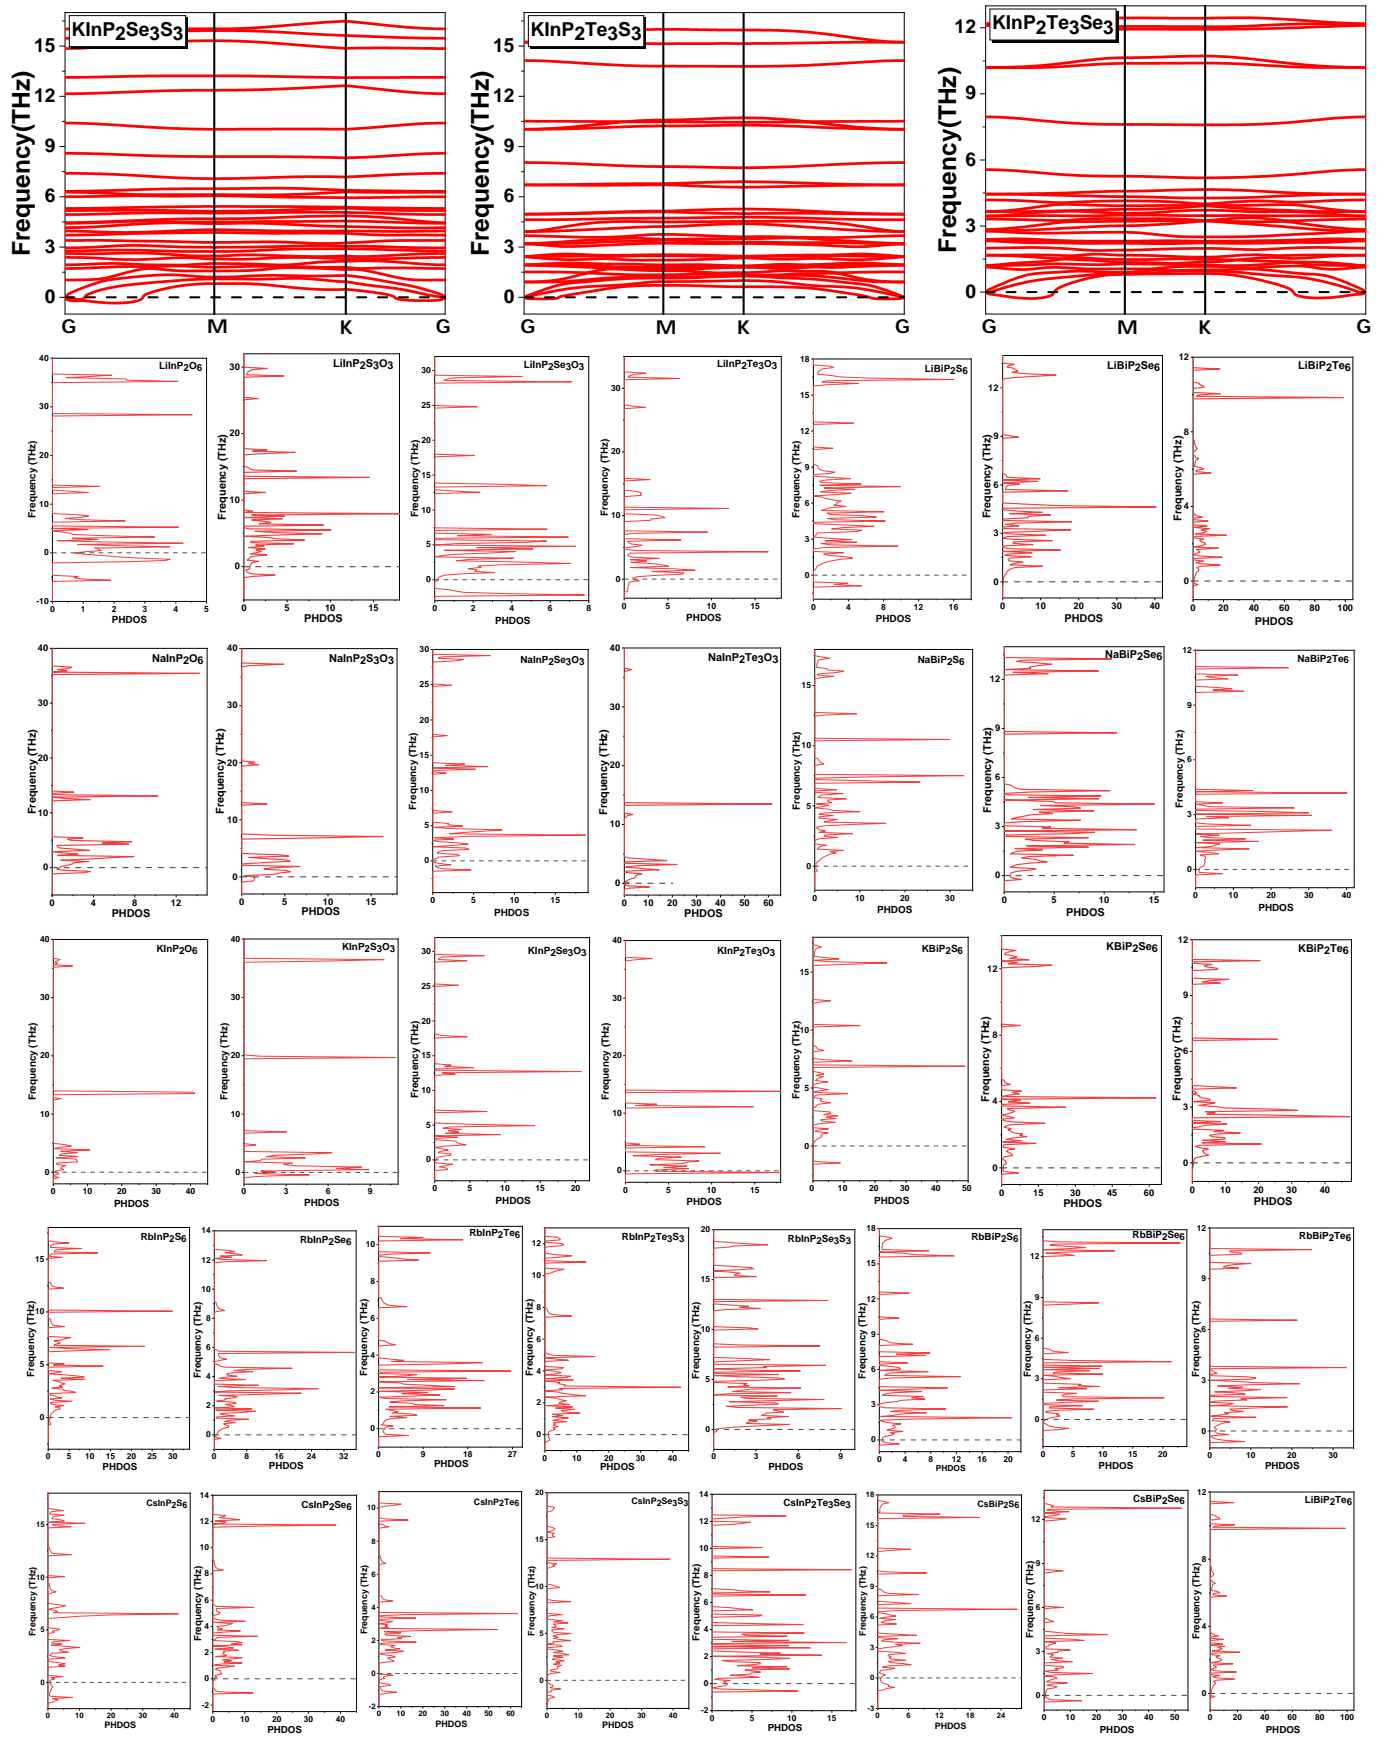

Fig. S1 The calculated phonon dispersion spectras and PHDOS of 2D AMInP<sub>2</sub>X<sub>6</sub> and AMInP<sub>2</sub>X<sub>3</sub>Y<sub>3</sub> monolayers.

**Table S2** Stable 2D AMInP<sub>2</sub>X<sub>6</sub> and AMInP<sub>2</sub>X<sub>3</sub>Y<sub>3</sub> monolayers: lattice constant  $a(\text{\AA})$ , material thickness  $h(\text{\AA})$ ; formation energy  $E_{\text{form}}$  and cohesive energy  $E_{\text{coh}}$  (eV), in-plane stiffness (or in-plane Young's modulus):  $C$  (N/m), Poisson's ratio  $\nu$ .

|                                                    | $a$  | $h$  | $E_{\text{form}}$ | $E_{\text{coh}}$ | $C_{11}$ | $C_{12}$ | $C_{66}$ | $C$   | $\nu$ |
|----------------------------------------------------|------|------|-------------------|------------------|----------|----------|----------|-------|-------|
| LiInP <sub>2</sub> S <sub>6</sub>                  | 6.16 | 3.33 | -0.53             | 3.55             | 53.05    | 13.74    | 19.66    | 49.50 | 0.26  |
| LiInP <sub>2</sub> Se <sub>6</sub>                 | 6.52 | 3.51 | -0.43             | 3.16             | 43.91    | 11.67    | 16.12    | 40.81 | 0.27  |
| LiInP <sub>2</sub> Se <sub>3</sub> S <sub>3</sub>  | 6.34 | 3.41 | -0.47             | 3.34             | 49.94    | 13.37    | 18.29    | 46.37 | 0.27  |
| LiInP <sub>2</sub> Te <sub>3</sub> S <sub>3</sub>  | 6.64 | 3.50 | -0.31             | 3.10             | 47.03    | 13.63    | 16.70    | 43.08 | 0.29  |
| LiInP <sub>2</sub> Te <sub>3</sub> Se <sub>3</sub> | 6.78 | 3.59 | -0.28             | 2.92             | 44.27    | 12.30    | 15.99    | 40.86 | 0.28  |
| NaInP <sub>2</sub> S <sub>6</sub>                  | 6.34 | 3.43 | -0.51             | 3.48             | 47.56    | 14.08    | 16.74    | 43.39 | 0.30  |
| NaInP <sub>2</sub> Se <sub>6</sub>                 | 6.68 | 3.62 | -0.41             | 3.09             | 39.30    | 12.64    | 13.33    | 35.24 | 0.32  |
| NaInP <sub>2</sub> Te <sub>6</sub>                 | 7.24 | 3.88 | -0.14             | 2.64             | 29.30    | 11.27    | 9.02     | 24.97 | 0.38  |
| NaInP <sub>2</sub> Se <sub>3</sub> S <sub>3</sub>  | 6.50 | 3.50 | -0.45             | 3.28             | 44.43    | 13.95    | 15.24    | 40.05 | 0.31  |
| NaInP <sub>2</sub> Te <sub>3</sub> S <sub>3</sub>  | 6.76 | 3.54 | -0.32             | 3.05             | 45.83    | 17.45    | 14.19    | 39.18 | 0.38  |
| NaInP <sub>2</sub> Te <sub>3</sub> Se <sub>3</sub> | 6.92 | 3.65 | -0.27             | 2.86             | 41.35    | 15.08    | 13.17    | 35.85 | 0.36  |
| KInP <sub>2</sub> S <sub>6</sub>                   | 6.56 | 3.52 | -0.51             | 3.44             | 45.00    | 17.17    | 13.92    | 38.44 | 0.38  |
| KInP <sub>2</sub> Se <sub>6</sub>                  | 6.90 | 3.72 | -0.42             | 3.08             | 36.83    | 15.30    | 10.76    | 30.47 | 0.42  |
| KInP <sub>2</sub> Te <sub>6</sub>                  | 7.44 | 3.99 | -0.18             | 2.66             | 26.52    | 14.05    | 6.23     | 19.07 | 0.53  |
| KInP <sub>2</sub> Se <sub>3</sub> S <sub>3</sub>   | 6.65 | 3.53 | -0.47             | 3.27             | 41.11    | 15.37    | 12.87    | 35.36 | 0.37  |
| KInP <sub>2</sub> Te <sub>3</sub> S <sub>3</sub>   | 6.85 | 3.57 | -0.35             | 3.06             | 31.78    | 29.57    | 1.10     | 4.26  | 0.93  |
| KInP <sub>2</sub> Te <sub>3</sub> Se <sub>3</sub>  | 7.05 | 3.67 | -0.29             | 2.86             | 37.60    | 16.74    | 10.45    | 30.15 | 0.45  |

### 3 The mechanical stability of the stable 2D AMInP<sub>2</sub>X<sub>3</sub>Y<sub>3</sub> monolayers phases

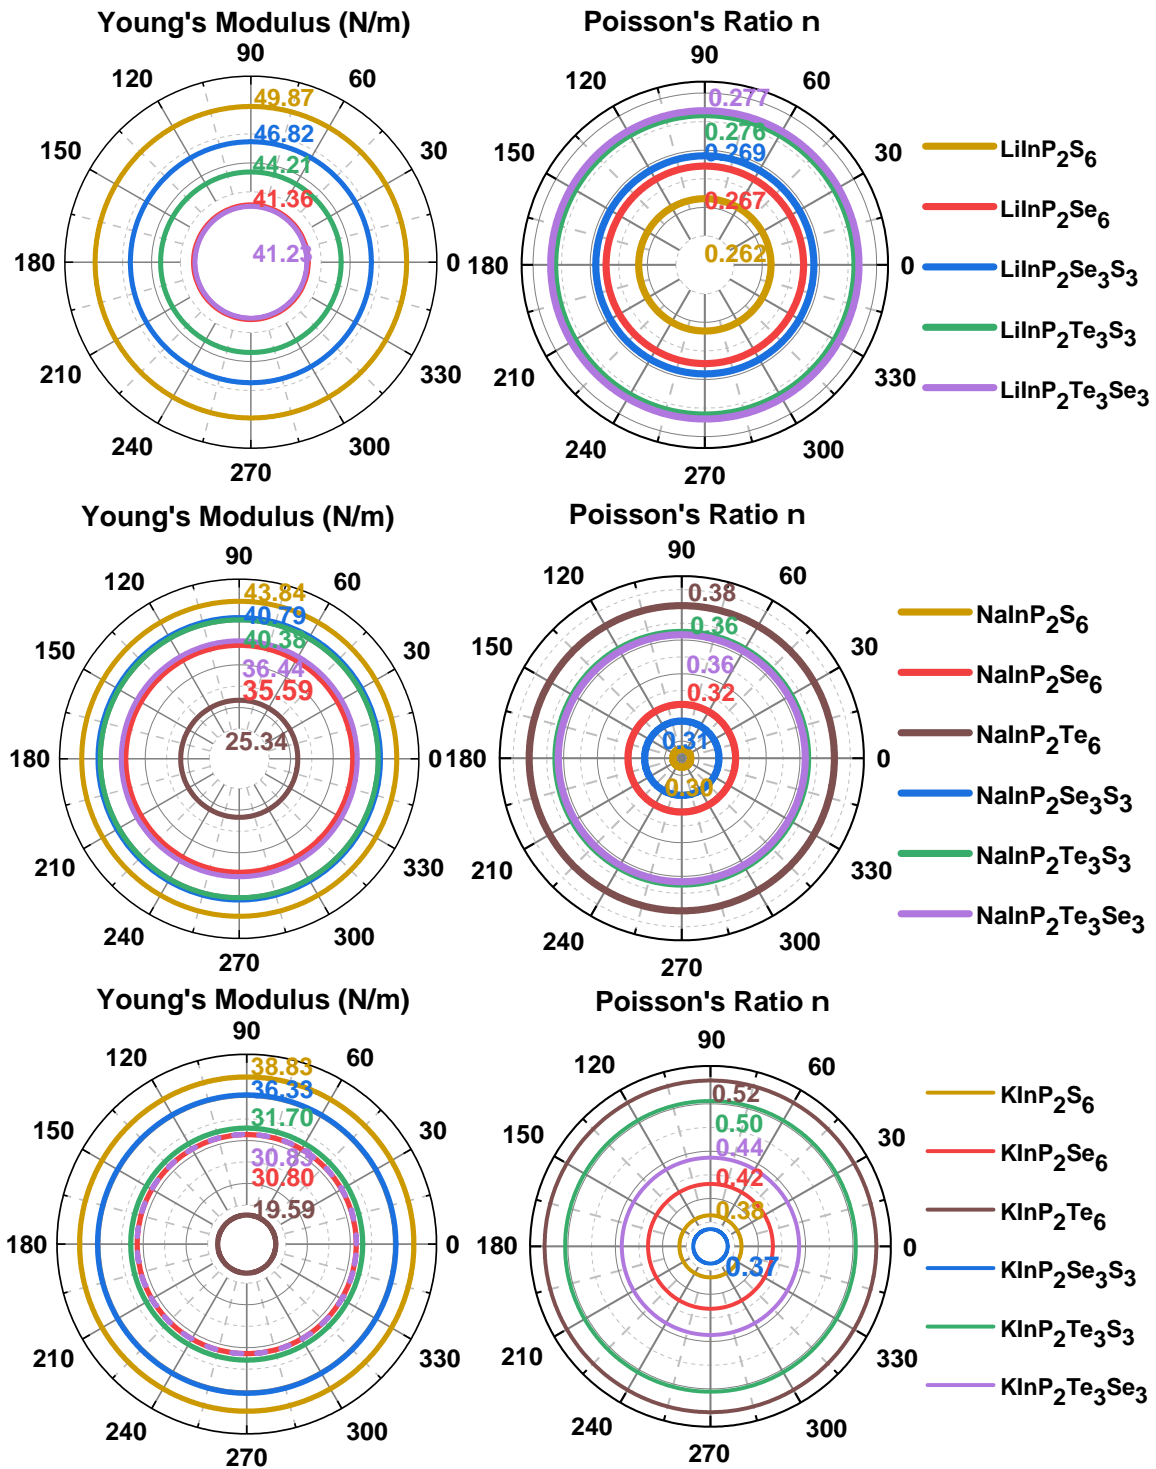

Fig. S2 Calculated orientation-dependent Young's modulus ( $Y(\theta)$ ) (left panels) and Poisson's ratio ( $\nu(\theta)$ ) (right panels).

#### 4 The electronic band structure of the stable 2D AMInP<sub>2</sub>X<sub>3</sub>Y<sub>3</sub> monolayers phases

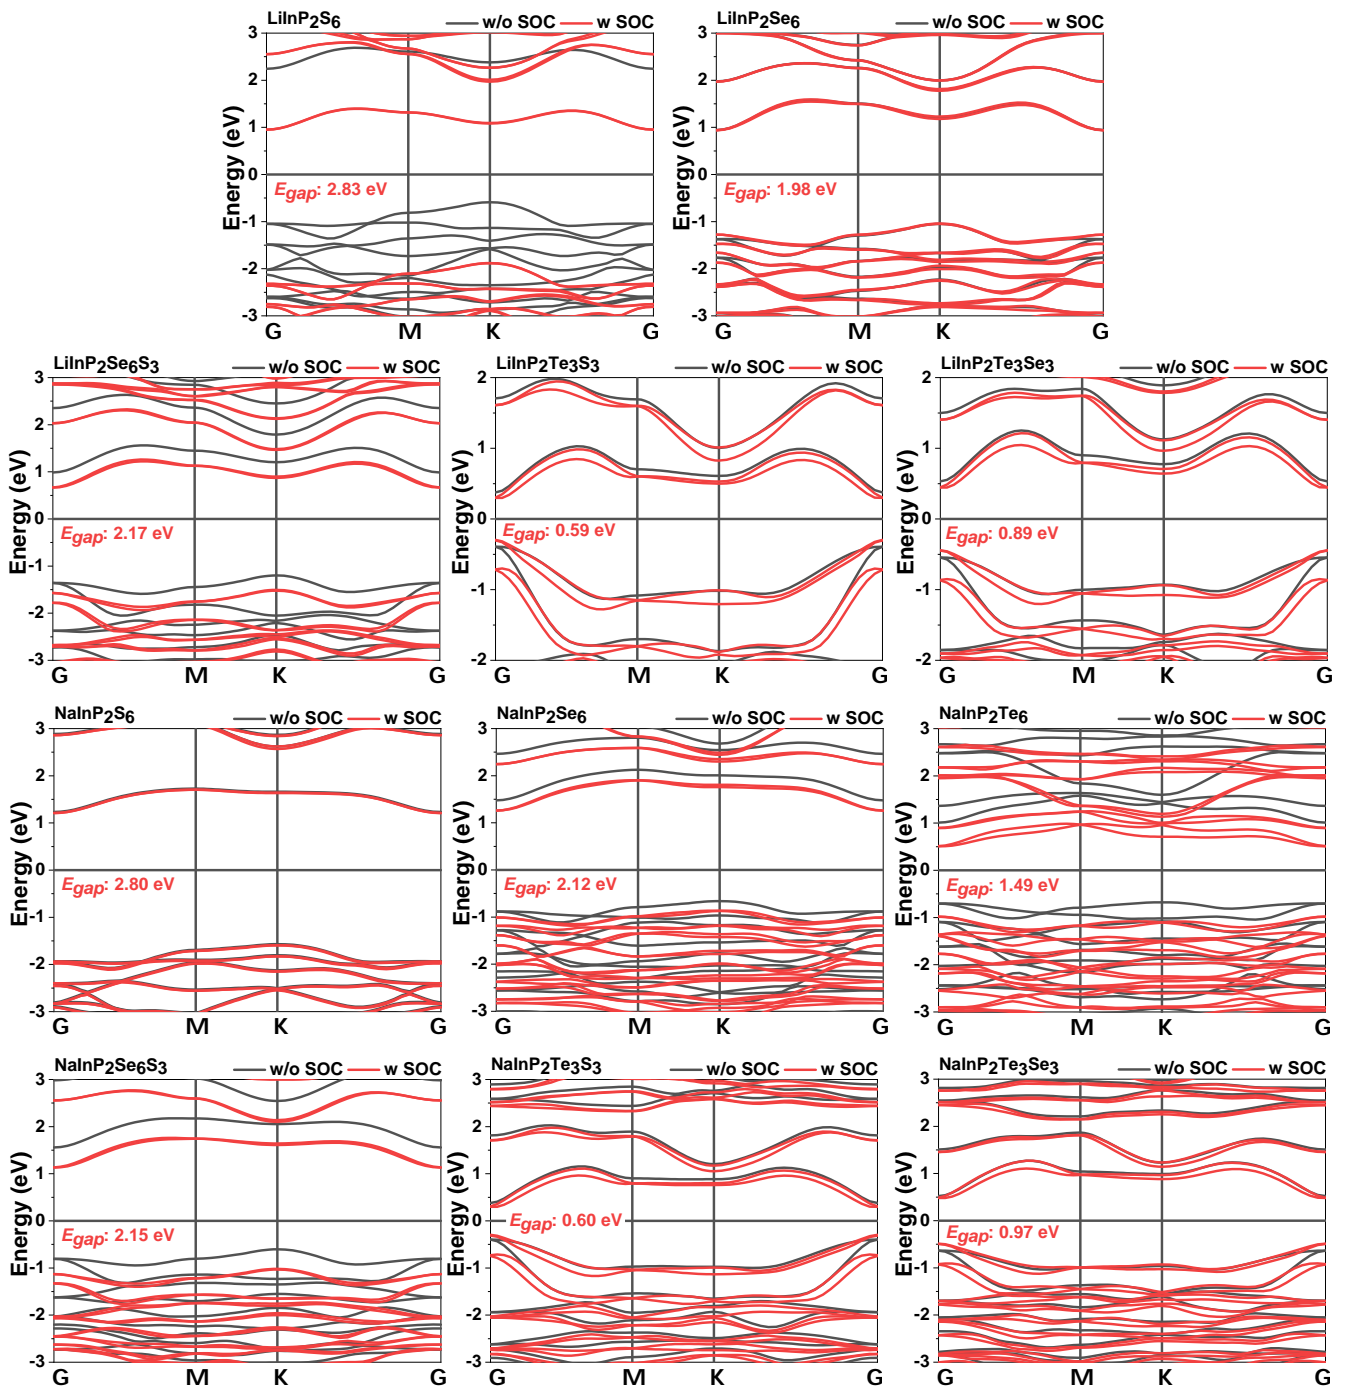



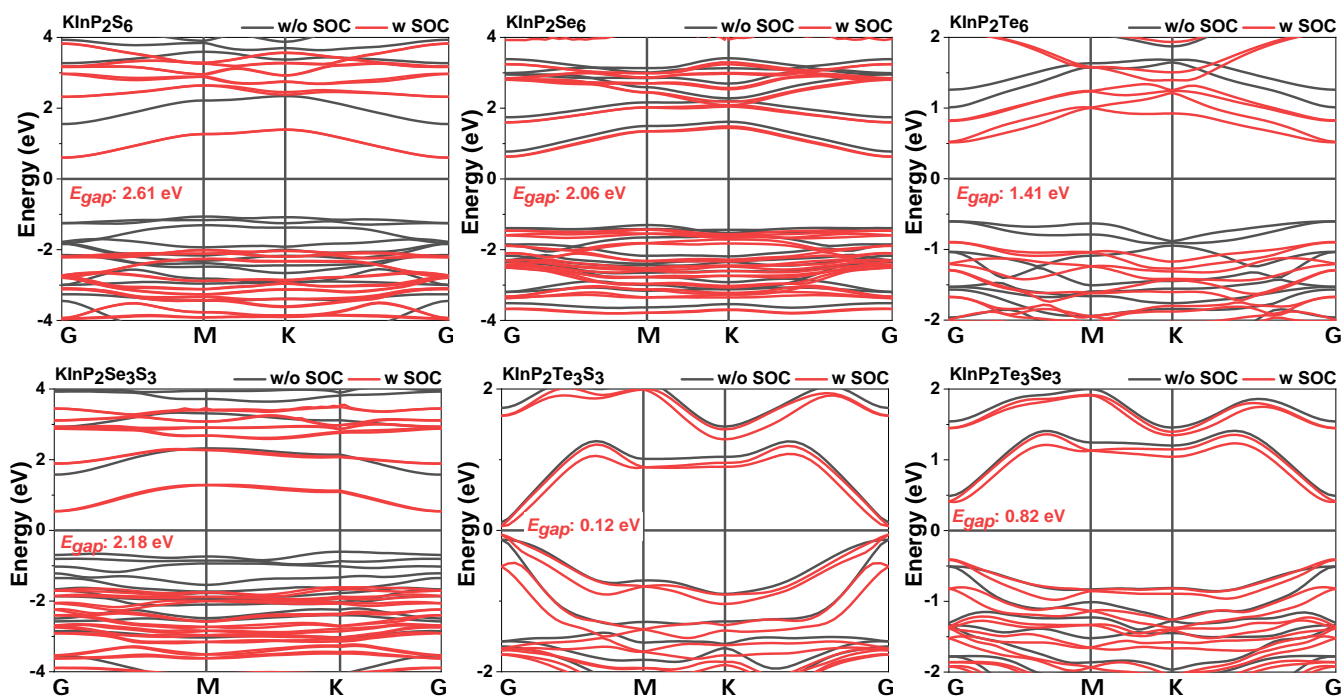

Fig. S3 Electronic band structure of  $\text{AMInP}_2\text{X}_6$  and  $\text{AMInP}_2\text{X}_3\text{Y}_3$  monolayers without (black line) and with spin-orbit coupling (SOC) (red line) at the HSE06 hybrid functional level of theory.

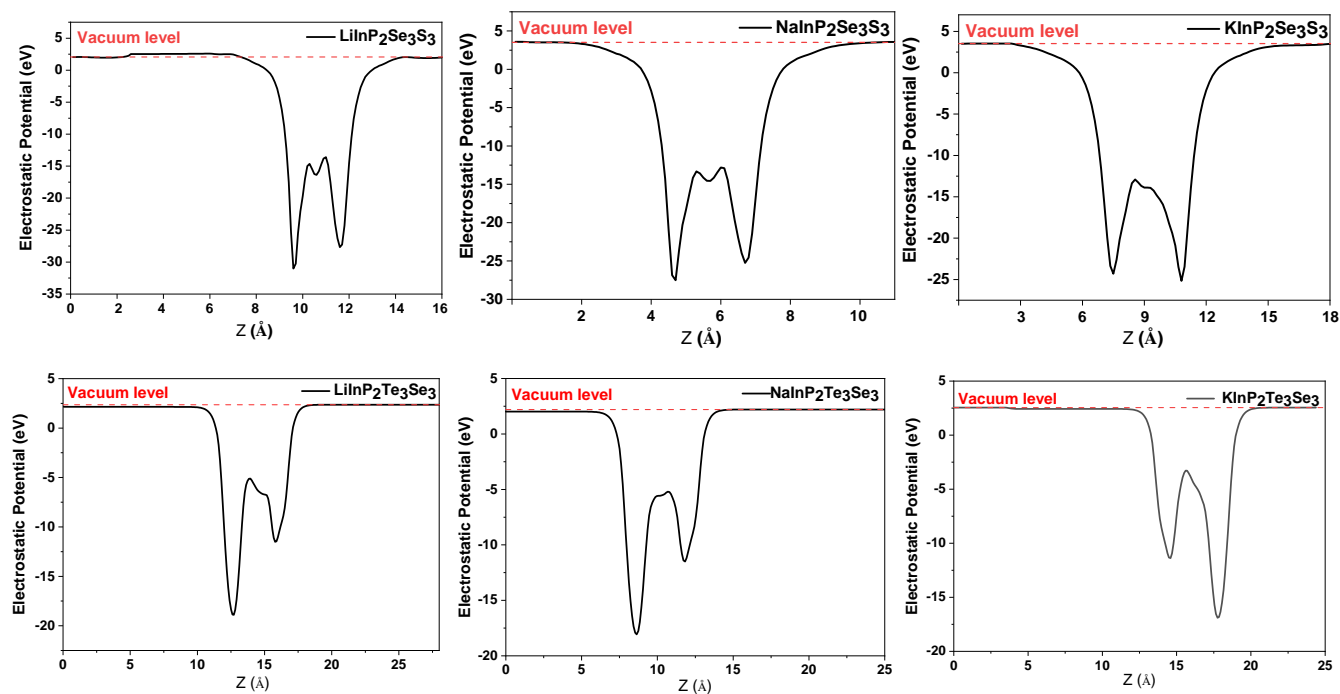

Fig. S4 Planar average electrostatic potential energy of  $\text{AMInP}_2\text{Se}_3\text{S}_3$  and  $\text{AMInP}_2\text{Te}_3\text{Se}_3$  monolayers.



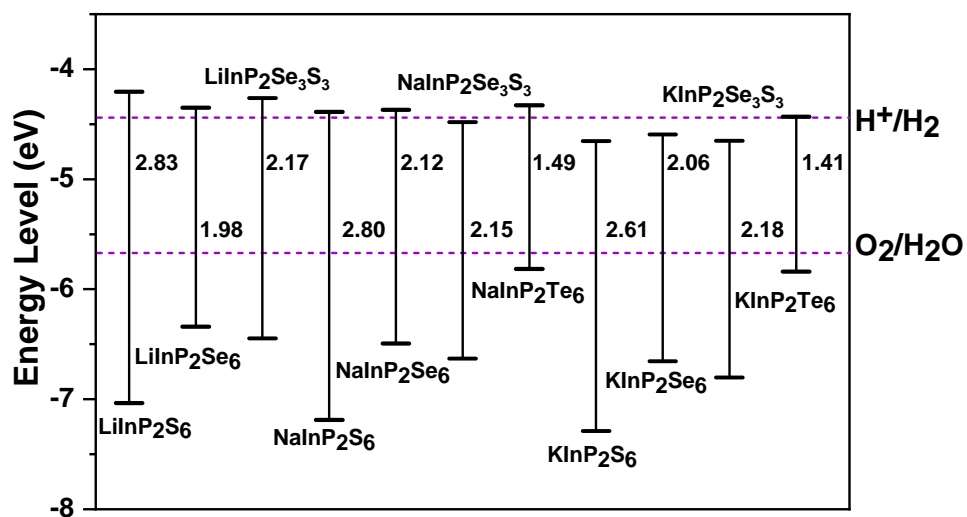

Fig. S5 Band edge positions with water redox potential for water splitting at pH = 0 for AMInP<sub>2</sub>X<sub>6</sub>, LiInP<sub>2</sub>Se<sub>3</sub>S<sub>3</sub>, NaInP<sub>2</sub>Se<sub>3</sub>S<sub>3</sub> monolayers along the z-direction based on the HSE06 level of theory.

## 5 Convergence test

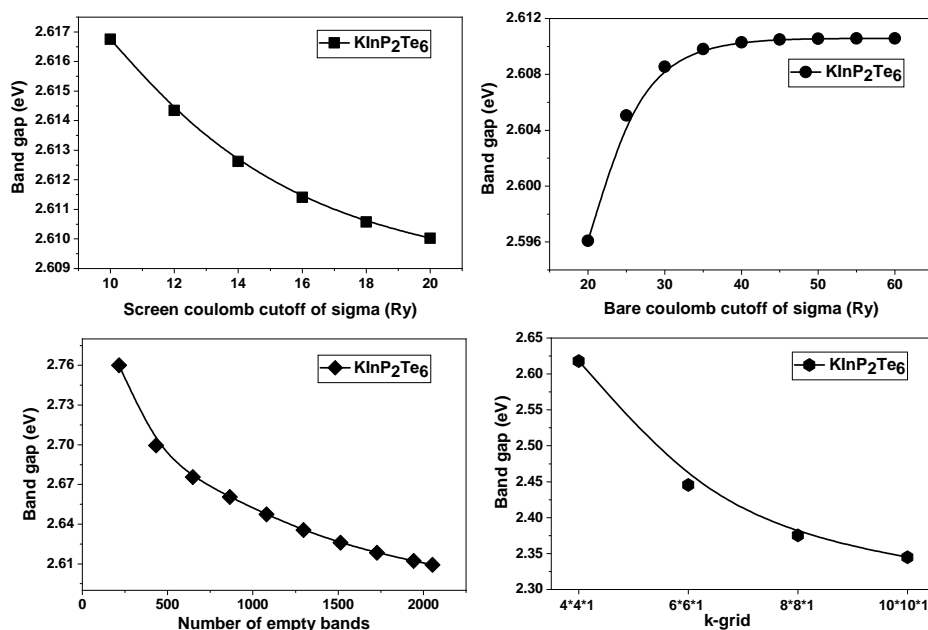

Fig. S6 Convergence of band gap to the kinetic energy cutoff, the bare coulomb cutoff of sigma, the screened cutoff of sigma, k-point sampling for KInP<sub>2</sub>Te<sub>6</sub> monolayer.

## 6 Van der Waals heterostructures

In order to ensure thermodynamical stability, the binding energy is an essential parameter to be determined. The binding energy of the vdW heterostructures (vdWH) is evaluated as  $E_b = \frac{E_{\text{hetero}} - E_{\text{top}} - E_{\text{down}}}{A}$ , where  $E_{\text{hetero}}$  is the total energy of the vdWH,  $E_{\text{top}}$  and  $E_{\text{down}}$  represent the total energy of the pristine top and bottom monolayers (for the supercell having the same lattice parameters as that of the vdWH) and  $A$  is the area of the vdWH.

**Table S3** The conduction band offsets (CBO) ( $\Delta E_c$ ) with SOC, lattices mismatch, interlayer distance ( $d$ ), and binding energy of heterostructures. Power conversion efficiency (PCE) of proposed 2D heterostructure solar cells without/with SOC. A blank position means no heterostructured solar cell can be constructed.

| Materials                                                                                              | CBO (eV) | Lattice mismatch (%) | $d$ (Å) | $E_b$ (meV/Å <sup>2</sup> ) | PCE (%) without SOC | PCE (%) with SOC |
|--------------------------------------------------------------------------------------------------------|----------|----------------------|---------|-----------------------------|---------------------|------------------|
| NaInP <sub>2</sub> Te <sub>6</sub> /KInP <sub>2</sub> Te <sub>6</sub>                                  | 0.10     | 0.80                 | 2.50    | -1.38                       | 17.42               | 21.33            |
| NaInP <sub>2</sub> Te <sub>6</sub> /NaInP <sub>2</sub> Te <sub>3</sub> Se <sub>3</sub>                 | 0.39     | 0.50                 | 2.75    | -1.60                       |                     | 16.43            |
| NaInP <sub>2</sub> Te <sub>6</sub> /CrS <sub>2</sub>                                                   | 0.23     | 0.70                 | 3.50    | -1.97                       | 11.08               | 13.30            |
| NaInP <sub>2</sub> Te <sub>6</sub> /MoGe <sub>2</sub> N <sub>4</sub>                                   | 0.37     | 0.30                 | 3.25    | -1.18                       |                     | 16.04            |
| NaInP <sub>2</sub> Te <sub>6</sub> /PtS <sub>2</sub>                                                   | 0.10     | 0.10                 | 2.75    | -1.67                       | 17.42               | 21.53            |
| NaInP <sub>2</sub> Te <sub>6</sub> /InSe                                                               | 0.06     | 0.20                 | 3.50    | -68.61                      | 17.57               | 22.12            |
| KInP <sub>2</sub> Te <sub>6</sub> /NaInP <sub>2</sub> Te <sub>3</sub> Se <sub>3</sub>                  | 0.29     | 0.40                 | 3.50    | -0.72                       |                     | 17.80            |
| KInP <sub>2</sub> Te <sub>6</sub> /MoGe <sub>2</sub> N <sub>4</sub>                                    | 0.27     | 0.40                 | 2.75    | -1.09                       |                     | 18.23            |
| LiInP <sub>2</sub> Te <sub>3</sub> Se <sub>3</sub> /NaInP <sub>2</sub> Te <sub>3</sub> Se <sub>3</sub> | 0.15     | 0.40                 | 3.00    | -0.59                       | 18.84               | 16.80            |
| LiInP <sub>2</sub> Te <sub>3</sub> Se <sub>3</sub> /KInP <sub>2</sub> Te <sub>3</sub> Se <sub>3</sub>  | 0.30     | 0.10                 | 2.75    | -0.42                       | 14.33               | 10.45            |
| LiInP <sub>2</sub> Te <sub>3</sub> Se <sub>3</sub> /CrS <sub>2</sub>                                   | 0.27     | 0.04                 | 2.75    | -0.29                       | 13.73               | 11.16            |
| LiInP <sub>2</sub> Te <sub>3</sub> Se <sub>3</sub> /PdSe <sub>2</sub>                                  | 0.23     | 0.60                 | 3.25    | -1.08                       | 14.93               | 12.57            |
| LiInP <sub>2</sub> Te <sub>3</sub> Se <sub>3</sub> /HfSe <sub>2</sub>                                  | 0.32     | 0.07                 | 2.50    | -2.39                       | 20.05               | 9.40             |
| LiInP <sub>2</sub> Te <sub>3</sub> Se <sub>3</sub> /MoGe <sub>2</sub> N <sub>4</sub>                   | 0.13     | 0.30                 | 3.50    | -0.46                       |                     | 16.10            |
| NaInP <sub>2</sub> Te <sub>3</sub> Se <sub>3</sub> /CrS <sub>2</sub>                                   | 0.12     | 0.40                 | 3.25    | -0.69                       | 19.46               | 20.87            |
| NaInP <sub>2</sub> Te <sub>3</sub> Se <sub>3</sub> /PdSe <sub>2</sub>                                  | 0.12     | 0.20                 | 2.50    | -0.84                       | 20.60               | 18.55            |
| NaInP <sub>2</sub> Te <sub>3</sub> Se <sub>3</sub> /HfSe <sub>2</sub>                                  | 0.12     | 0.03                 | 2.50    | -0.63                       |                     | 15.51            |
| NaInP <sub>2</sub> Te <sub>3</sub> Se <sub>3</sub> /MoGe <sub>2</sub> N <sub>4</sub>                   | 0.12     | 0.07                 | 2.50    | -0.55                       |                     | 21.93            |
| NaInP <sub>2</sub> Te <sub>3</sub> Se <sub>3</sub> /BiI <sub>3</sub>                                   | 0.12     | 0.30                 | 2.50    | -0.51                       | 13.50               | 11.45            |
| NaInP <sub>2</sub> Te <sub>3</sub> Se <sub>3</sub> /KInP <sub>2</sub> Te <sub>3</sub> Se <sub>3</sub>  | 0.12     | 0.08                 | 2.50    | -0.67                       | 20.02               | 16.18            |
| KInP <sub>2</sub> Te <sub>3</sub> Se <sub>3</sub> /HfSe <sub>2</sub>                                   | 0.02     | 0.90                 | 3.50    | -0.65                       |                     | 18.00            |
| KInP <sub>2</sub> Te <sub>3</sub> Se <sub>3</sub> /BiI <sub>3</sub>                                    | 0.15     | 0.03                 | 2.75    | -0.46                       |                     | 13.28            |
| KInP <sub>2</sub> Te <sub>3</sub> Se <sub>3</sub> /HfS <sub>2</sub>                                    | 0.16     | 0.20                 | 3.00    | -0.65                       |                     | 12.92            |
| KInP <sub>2</sub> Te <sub>3</sub> Se <sub>3</sub> /CrS <sub>2</sub>                                    |          |                      |         |                             | 22.14               |                  |

## 7 Photocatalytic Water Splitting

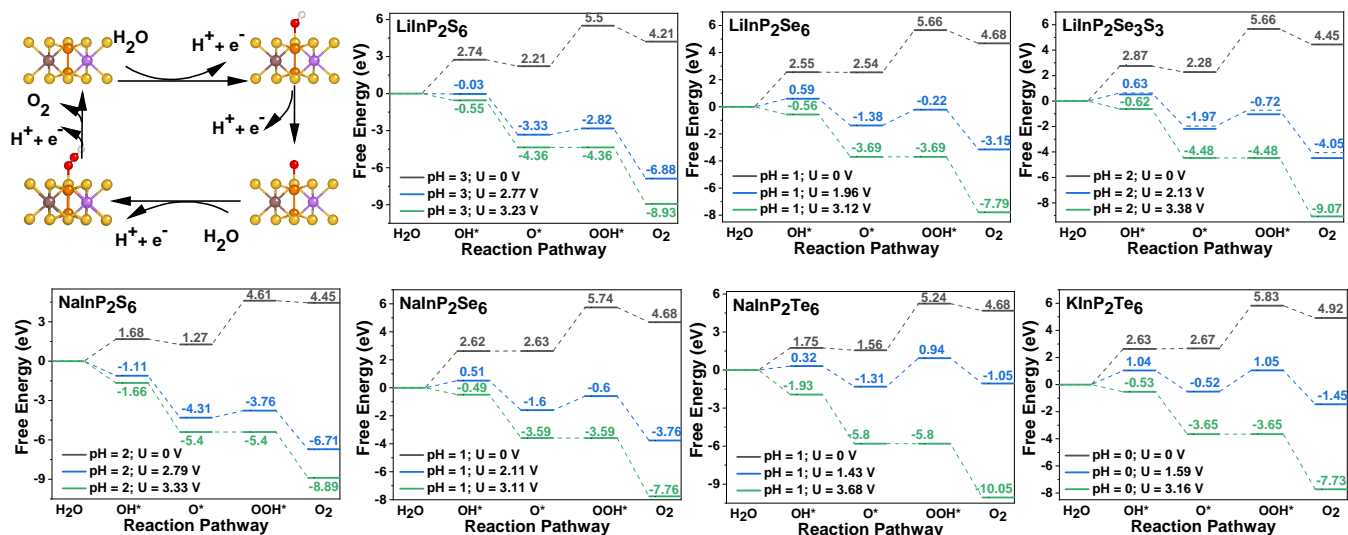

**Fig. S7** Proposed photocatalytic pathways of water oxidation half-reactions with the most energetically favorable absorbed intermediates ( $\text{OH}^*$ ,  $\text{O}^*$ , and  $\text{OOH}^*$ ) in the  $\text{LiInP}_2\text{S}_6$  monolayer. The red and white balls represent O and H atoms, respectively. Gibbs free energy ( $\Delta G$ ) vs. reaction coordinate for water oxidation half-reactions in  $\text{AMInP}_2\text{X}_6$  and  $\text{LiInP}_2\text{Se}_3\text{S}_3$  monolayers applied at  $\text{pH} = 0$  under different potentials. The value of  $\Delta G$  in each elementary step is also shown. The blue lines denote the free energy of OERs under the external voltage supplied by photoexcited carriers.

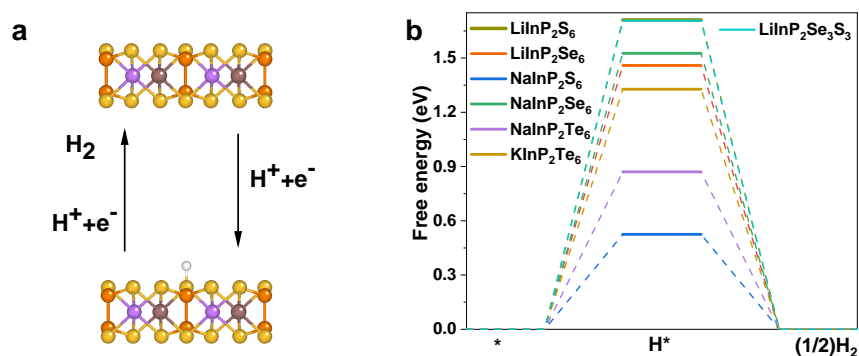

**Fig. S8** Proposed photocatalytic pathways along with the atomic configuration of hydrogen reduction (a). The green ball represents the H atom. Gibbs free energy ( $\Delta G$ ) vs. reaction coordinate for hydrogen reduction half-reactions in  $\text{AMInP}_2\text{X}_6$  and  $\text{LiInP}_2\text{Se}_3\text{S}_3$  monolayers applied at  $\text{pH} = 0$  at potential  $U = 0$ .

### Notes and references

- Z. B. Chen, T. F. Jaramillo, T. G. Deutsch, A. Kleiman-Shwarstein, A. J. Forman, N. Gaillard, R. Garland, K. Takanebe, C. Heske, M. Sunkara, E. W. McFarland, K. Domen, E. L. Miller, J. A. Turner and H. N. Dinh, *J. Mater. Res.*, 2010, **25**, 3–16.
- Z. B. Chen, T. F. Jaramillo, T. G. Deutsch, A. Kleiman-Shwarstein, A. J. Forman, N. Gaillard, R. Garland, K. Takanebe, C. Heske, M. Sunkara, E. W. McFarland, K. Domen, E. L. Miller, J. A. Turner and H. N. Dinh, *J. Mater. Res.*, 2010, **25**, 3–16.
- C. A. Gueymard, *Solar Energy*, 2004, **76**, 423–453.
- C. C. L. McCrory, S. H. Jung, J. C. Peters and T. F. Jaramillo, *J. Am. Chem. Soc.*, 2013, **135**, 16977–16987.
- Y. Zheng, Y. Jiao, M. Jaroniec and S. Z. Qiao, *Angew. Chem., Int. Ed.*, 2015, **54**, 52–65.
- R. D. Johnson, *Abstracts of Papers of the American Chemical Society*, 2005, **230**, U1015–U1015.
- H. Xu, D. Cheng, D. Cao and X. C. Zeng, *Nat. Catal.*, 2018, **1**, 339–348.
